# Supplementary material for: Some statistical theory for interpreting reference distributions
Source: bioRxiv or medRxiv preprint supplement (doi:10.1101/2024.07.23.24309680), 2024-07-24
Supplement: Supplementary file [file media-1.pdf]

Supplementary material for “Some statistical theory for interpreting reference distributions”

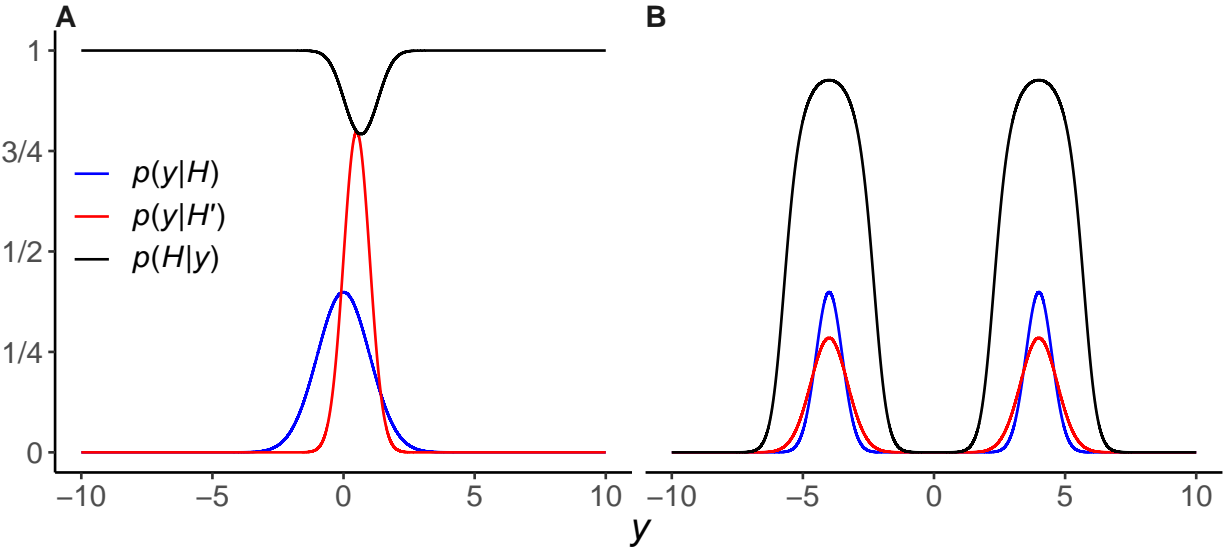

Figure S1: More examples as in Fig. 1.

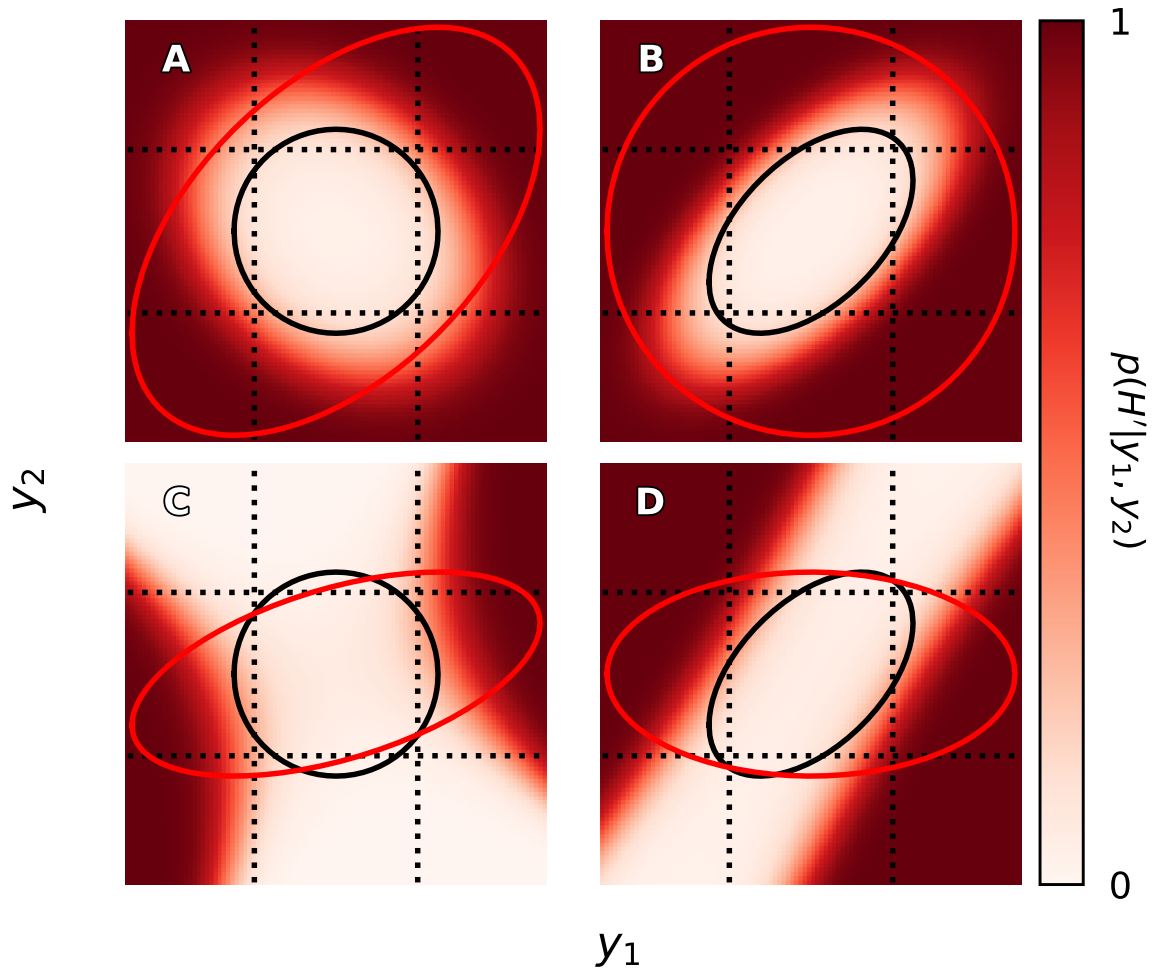

**Figure S2:** More examples as in Fig. 2, focusing on when  $y_1$  and  $y_2$  covary among healthy people or non-healthy people but not both.

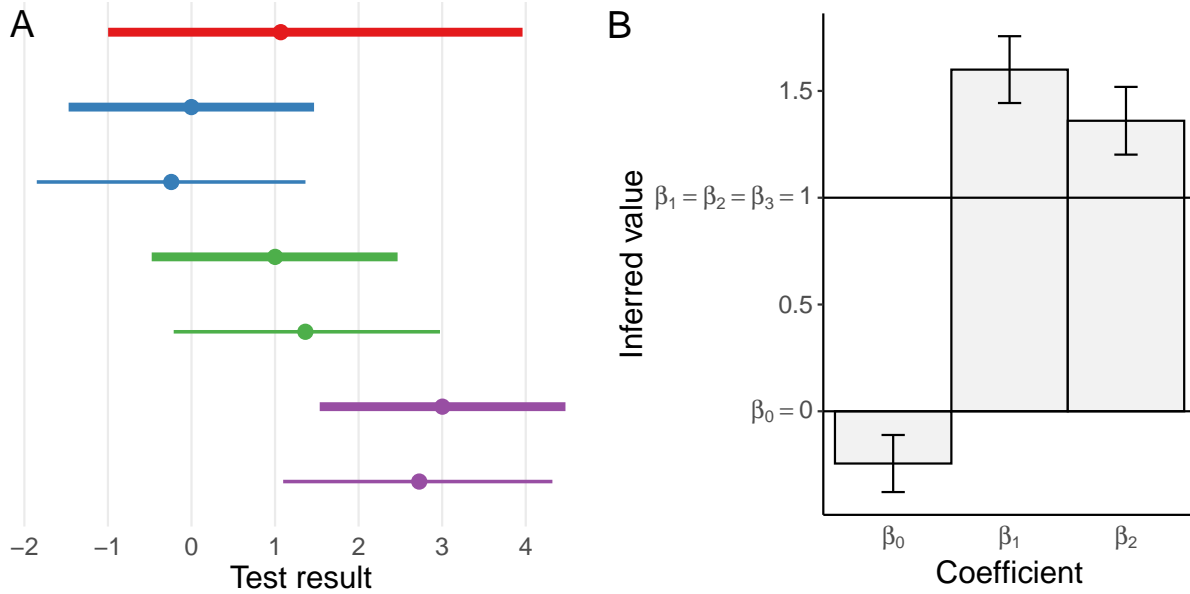

**Figure S3:** Inferences of a linear model of test results from 100 simulated observations when an interaction term is unaccounted for. There are two binary features,  $x_1$  and  $x_2$ , both with 50% prevalence. The model is  $y = \beta_0 + \beta_1 x_1 + \beta_2 x_2 + \epsilon$  but there is in truth an additional interaction term  $\beta_3 x_1 x_2$ . The true coefficients are  $\beta_0 = 0$  and  $\beta_1 = \beta_2 = \beta_3 = 1$ , and the error is  $\epsilon \sim \text{Normal}(0, 3/4)$ . (A) 95% central intervals of true (bold lines) and posterior predictive distributions (thin lines) of results in the population (red) as features are conditioned on:  $x_1 = x_2 = 0$  (blue),  $x_1 = 1$  and  $x_2 = 0$  (green), and  $x_1 = x_2 = 1$  (purple). Points represent medians. (B) Mean posterior coefficient estimates with standard errors.
